# Sensitive detection of *Plasmodium vivax* malaria by the rotating-crystal magneto-optical method in Thailand

Ágnes Orbán<sup>1\*</sup>, Rhea J. Longley<sup>2,3,4</sup>, Piyarat Sriporote<sup>3</sup>, Nongnuj Maneechai<sup>3</sup>, Wang Nguitragool<sup>5</sup>, Adam Butykai<sup>1</sup>, Ivo Mueller<sup>2,4,6</sup>, Jetsumon Sattabongkot<sup>3</sup>, Stephan Karl<sup>7,8</sup>, István Kézsmárki<sup>1,9</sup>

1 Department of Physics, Budapest University of Technology and Economics, Budapest, Hungary.

2 Population Health and Immunity Division, Walter and Eliza Hall Institute of Medical Research, Melbourne, Victoria, Australia.

3 Mahidol Vivax Research Unit, Mahidol University, Bangkok, Thailand.

4 Department of Medical Biology, University of Melbourne, Melbourne, Victoria, Australia.

5 Department of Molecular Tropical Medicine and Genetics, Mahidol University, Bangkok, Thailand.

6 Unité Malaria: Parasites et Hôtes, Département Parasites et Insectes Vecteurs, Institut Pasteur, Paris, France.

7 Vector-borne Diseases Unit, PNG Institute of Medical Research, Madang, Madang Province 511, Papua New Guinea.

8 Australian Institute of Tropical Health and Medicine, James Cook University, Smithfield, Queensland, Australia.

9 Experimental Physics 5, Center for Electronic Correlations and Magnetism, University of Augsburg, Augsburg, Germany.

\*corresponding author: [orbanag@gmail.com](mailto:orbanag@gmail.com)

## Abstract

The rotating-crystal magneto-optical detection (RMOD) method has been developed for the rapid and quantitative diagnosis of malaria and tested systematically on various malaria infection models. Very recently, an extended field trial in a high-transmission region of Papua New Guinea demonstrated its great potential for detecting malaria infections, in particular *Plasmodium vivax*. In the present small-scale field test, carried out in a low-transmission area of Thailand, RMOD confirmed malaria in all samples found to be infected with *Plasmodium vivax* by microscopy, our reference method. Moreover, the magneto-optical signal for this sample set was typically 1–3 orders of magnitude higher than the cut-off value of RMOD determined on uninfected samples. Based on the serial dilution of the original patient samples, we expect that the method can detect *Plasmodium vivax* malaria in blood samples with parasite densities as low as  $\sim 5 - 10$  parasites per microliter, a limit around the pyrogenic threshold of the infection. In addition, by investigating the correlation between the magnitude of the magneto-optical signal, the parasite density and the erythrocytic stage distribution, we estimate the relative hemozoin production rates of the ring and the trophozoite stages of *in vivo Plasmodium vivax* infections.

**NOTE: This preprint reports new research that has not been certified by peer review and should not be used to guide clinical practice.**

## Introduction

Although humanity is continuously facing novel medical challenges, the management of preventable infectious diseases, which place heavy burden on tropical countries, has been a long-sought goal of the WHO [1]. One such disease is malaria, and by virtue of increased global and local efforts significant progress has been made towards its control worldwide. Since many countries are working towards the substantial reduction of disease burden, the development of sensitive, rapid, high-throughput and low-cost malaria diagnostic methods applicable for mass-screening is a pressing issue in tropical diseases research [2].

One promising diagnostic approach is the utilisation of the magnetic properties of *Plasmodium*-infected red blood cells, as it may enable the rapid and quantitative detection of the infection at low cost [3–7]. During the intraerythrocytic cycle the parasites break down the hemoglobin of their host cell and sequester its iron content into the inert, submicron-sized paramagnetic hemozoin crystals, which are distinguishing features of all blood-stage *Plasmodium* infections [8, 9]. In the recent years, our research group has developed a new technique, the rotating-crystal magneto-optical diagnostic detection (RMOD) method, which is capable of the quantitative detection of malaria by measuring the amount of hemozoin produced during the course of the infection. The diagnostic capability of RMOD was tested in several steps using synthetic  $\beta$ -hematin crystals, *P. falciparum* cell cultures and mouse infections [10–13]. Furthermore, it proved to be an efficient tool for conducting rapid, yet sensitive drug susceptibility assays [14].

Recently, a detailed evaluation of RMOD has been carried out in an extended field trial in Papua New Guinea (PNG) involving almost one thousand malaria-suspected patients and multiple reference methods [15]. One important — and anticipated — observation of the study was that infections with different species led to different average blood hemozoin levels, resulting in a more sensitive detection of *P. vivax* than *P. falciparum*. However, the presence of stage V *P. falciparum* gametocytes increased the likelihood of identifying *P. falciparum* infections due to their high hemozoin content. As another key finding, the mean value and the standard deviation of the magneto-optical (MO) signal for samples which tested negative with all reference methods was significantly higher than expected from previous RMOD measurements on malaria-naïve blood samples [11, 12]. Accordingly, we concluded that in high-transmission settings, such as the study site in PNG, elevated hemozoin levels are likely to be maintained in the peripheral blood of a large proportion of the general population, either from concurrent low-level infections that are otherwise undetectable, or from previously resolved infections [16, 17].

In order to further investigate these observations and to assess the sensitivity of RMOD for diagnosing *P. vivax* infections in low-transmission settings, here we

use the technique to detect malaria in samples confirmed to be *P. vivax*-positive by microscopy from Thailand, a country with overall low malaria endemicity [18, 19]. In addition to testing the sensitivity of the method, we evaluate the correlation between the magnitude of the MO signal and the parasite stage distributions of the samples.

The potential of the magneto-optical approach for diagnosing malaria has also been demonstrated in a recent field test by another hemozoin-based tool, Gazelle, which showed a sensitivity of 96.2% for the detection of *P.vivax* infections [20]. The main difference between RMOD and Gazelle is that the former detects the periodic modulation of light transmission induced by the hemozoin crystals co-rotating with a rotating magnetic field, while the latter measures light transmission in stationary states with and without a static magnetic field. In spite of this technical difference, the physical principle of detection is common. Thus, the magneto-optical quantification of hemozoin should support not only a qualitative, but a quantitative diagnosis in both cases. While this capability has not been investigated for Gazelle, it is an important objective of the present study.

## Results

### The sensitivity of RMOD in detecting *P. vivax* infections

The parasite densities of the original 35 patient samples ranged from  $34\mu\text{l}^{-1}$  to  $5142\mu\text{l}^{-1}$  with a median of  $875\mu\text{l}^{-1}$ . As seen in Fig.1A., this range was well covered by the samples, though their parasite density distribution was not uniform.

Besides the overall parasite density, the erythrocytic stage distribution was also determined by an expert microscopist, and the parasites were classified as *rings*, *trophozoites*, *schizonts*, *male* and *female gametocytes*. The latter three forms contributed less than 10% to the overall parasite density in all samples with one exception, in which their proportion reached 35%. The sequestration of schizonts is a well-known phenomenon in *P. falciparum* infections, but the statistics of our *P. vivax* samples suggests that it also occurs for *P. vivax* [21]. Accordingly, the blood smears exhibited mostly rings and trophozoites, but their relative ratios varied in the sample population. A large fraction of samples (n=27) showed a relatively synchronous character and contained either predominantly ( $\geq 70\%$ ) rings or trophozoites as seen in Fig.1B. In contrast to the dominance of ring-stage parasites in the peripheral circulation of *P. falciparum* infections, in the case of these *P. vivax*-positive samples more than 30% of the samples showed no ring forms, and 88% contained trophozoites in more than 10%.

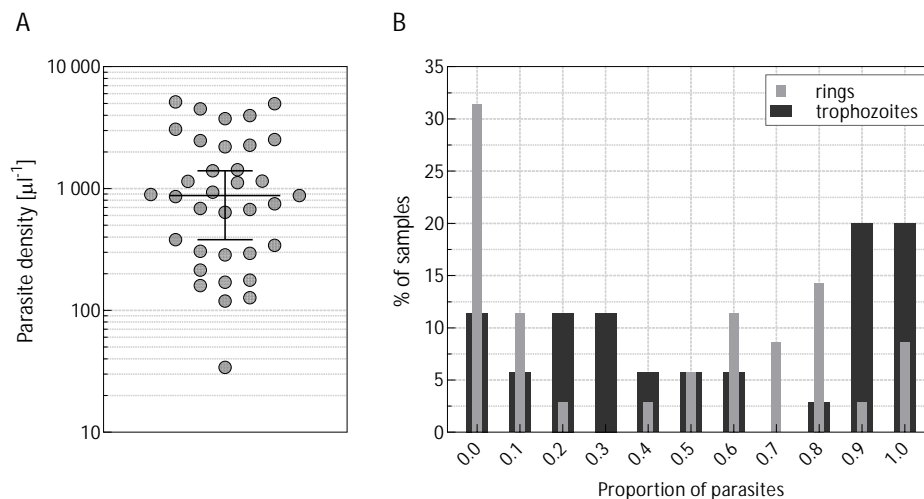

**Figure 1. Panel A.** The parasite density values of the *P. vivax*-infected samples ( $n=35$ ) with their median and the 95% confidence interval (95%-CI) of the median. **Panel B.** The percentage of samples containing the indicated proportion of rings (light grey columns) and trophozoites (dark grey columns), i.e., histograms of the incidence rate of rings and trophozoites.

As a first step, the level of the weak residual MO signal, that is present even 79  
in samples of malaria-naïve individuals, was measured on a pool of uninfected 80  
samples in order to establish a threshold that separates malaria-positive and 81  
negative RMOD incidences. Measurements on fourteen uninfected samples 82  
obtained from malaria-naïve individuals in Thailand, each measured in duplicates, 83  
yielded an average residual MO value of  $(0.50 \pm 0.22)\text{mV/V}$  as presented in Fig.2A. 84  
The MO signal level that separates malaria-positive and -negative incidences, 85  
i.e., the cut-off level, was determined as the mean plus two times the standard 86  
deviation of these residual values, assuming that the MO values of uninfected 87  
samples are normally distributed random variables. This led to a cut-off level of 88  
 $0.94 \text{ mV/V}$  as indicated by the horizontal black dotted line in Figs. 2B. and 2C. 89

As displayed in Fig.2B., all the *P. vivax*-infected blood samples tested above 90  
the cut-off, yielding a 100% sensitivity on this sample set. Moreover, for more 91  
than 90% of the samples the MO values are at least one order of magnitude larger 92  
than the cut-off, implying that the method can detect lower parasite densities. 93  
To model such cases, we chose ten of the original blood samples and prepared 94  
dilution series from them using uninfected whole blood as dilution medium. 95  
The parasite densities of the original ten samples change between  $34 \mu\text{l}^{-1}$  and 96  
 $4980 \mu\text{l}^{-1}$ , while the parasite densities of the most diluted samples cover the 97  
range of  $0.0003 - 9 \mu\text{l}^{-1}$ . 98

The MO values of the diluted samples prepared from the same infected 99  
specimen (identically coloured circles in Fig.2B.) decrease linearly with increasing 100  
dilution over several orders of magnitude as their parasite densities decrease 101

proportionally with the dilution. However, the MO values of highly diluted 102  
samples with very low parasite densities ( $< 1 \mu\text{l}^{-1}$ ) are independent of the 103  
nominal parasite load. These residual MO values are scattered around the mean 104  
residual value obtained for the uninfected controls, below the cut-off level defined 105  
previously. This further supports that this residual MO signal is unrelated to 106  
parasites. Accordingly, the limit of detection in terms of parasite density is 107  
defined as the average parasite density for samples with MO values near the 108  
cut-off, i.e., in the range of  $0.94 \pm 0.08 \text{ mV/V}$ . This estimate leads to a detection 109  
limit of approx.  $5 \mu\text{l}^{-1}$  (range:  $0.2 - 12 \mu\text{l}^{-1}$ ) as indicated by the black arrow 110  
(line segment) in Fig.2B. For comparison, this sensitivity threshold is somewhat 111  
better than the threshold reported in the recent field test of the Gazelle device, 112  
where the parasite density of false negative cases was reported to range from 18 113  
to  $174 \mu\text{l}^{-1}$ , when optical microscopy was used as a reference [20]. 114

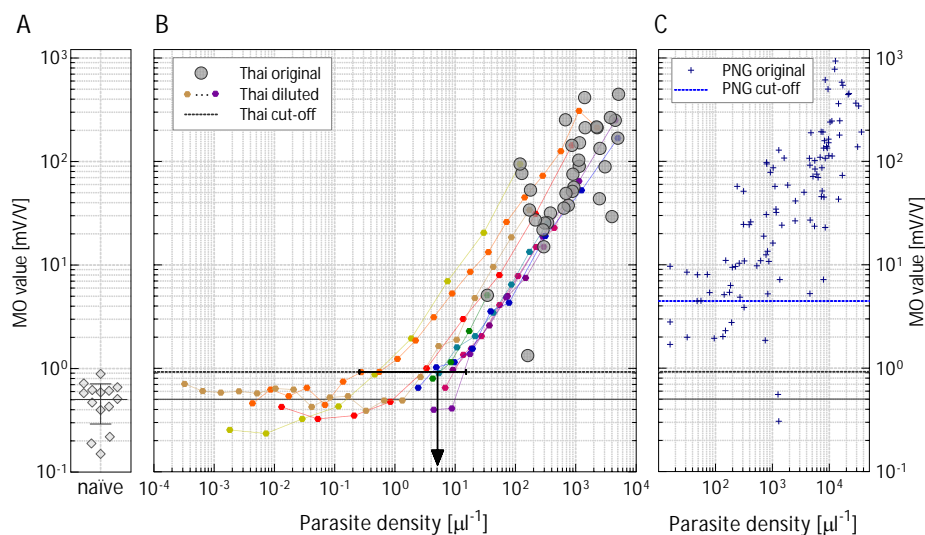

**Figure 2.** **Panel A.** The MO values of fourteen malaria-naïve samples obtained from two individuals at various time-points during the course of the study with their mean and standard deviation. **Panel B.** The MO values of the infected samples (grey circles,  $n=35$ ) plotted as the function of their parasite densities. Each data point represents the average MO value of at least two technical duplicates (individual errors are below 10% and obscured by the logarithmic scale). The coloured symbols show the MO values of samples obtained by serial dilution of ten infected samples. The black continuous and dashed lines indicate the mean MO value of the malaria-naïve samples and the cut-off level, respectively, while the black arrow marks the estimated lowest detectable parasite density by RMOD. **Panel C.** The blue asterisks show the MO values of *P. vivax*-infected samples collected in Papua New Guinea ( $n=104$ ), as reproduced from Ref. [15]. The blue dashed line marks the cut-off value for RMOD determined by receiver operating characteristic (ROC) analysis in that study [15].

## The correlation between the MO values, the parasite density and the stage distribution 115 116

As observed in Fig.2., the relationship between the parasite densities and the corresponding MO values is linear (Spearman Rank:  $R \geq 0.95, p < 0.0001$ ) for samples obtained by serial dilution as long as their MO values are above the cut-off level. However, the correlation between the MO values and parasite densities for the original (undiluted) samples is  $R = 0.66$  (Spearman rank, 95%-CI: 0.40 to 0.81) indicating only a moderate correlation. This scattering of the MO values for samples with nearly the same parasitemia naturally arises, at least in part, from the fact that RMOD quantifies the amount of hemozoin in blood, which depends not only on the overall parasite density, but also on the stage distribution of the circulating parasites and the clearance rate of hemozoin from the circulation. This scattering of the MO values due to the listed factors also explains the relatively large error of the detection limit specified above.

While the MO signal shows only a moderate correlation with the parasite density, it correlates better with the estimated hemozoin content ( $HZ$ ), which is a parameter calculated by assuming different hemozoin production rates of the different erythrocytic stages. When we use a subset of samples with clear dominance of rings and trophozoites, i.e., that contain schizonts and gametocytes in less than 3%, the hemozoin content is well approximated by  $HZ = 1 \cdot Ri + \alpha \cdot T$ , where  $Ri$  and  $T$  denote the density of rings and trophozoites, respectively, and  $\alpha$  is the relative hemozoin contribution of trophozoites compared to rings. (Please note that  $HZ$  parameter is a weighted parasite density, which is not equal to the actual hemozoin concentration, but is linearly proportional to it.) As shown in Fig.3A., the Spearman correlation coefficient between the MO values and the corresponding  $HZ$  values reaches its maximum,  $R = 0.9$ , at  $\alpha = 4.5 \pm 0.3$ . Although the assessment of the relative production rate for schizonts and gametocytes is less accurate due to their rare occurrence and the limited statistical sample size, their contribution is estimated to be approx. 12 – 20 times higher than the hemozoin content of rings. As presented in Fig.3B., for the full sample set the best Spearman correlation,  $R = 0.75$  (95%-CI: 0.55 to 0.87), was achieved with the following relative hemozoin contributions of the different stages:  $HZ = 1 \cdot Ri + 4.5 \cdot T + 17 \cdot (S + G)$ , where  $S$  and  $G$  denote the density of schizonts and gametocytes in the samples, respectively.

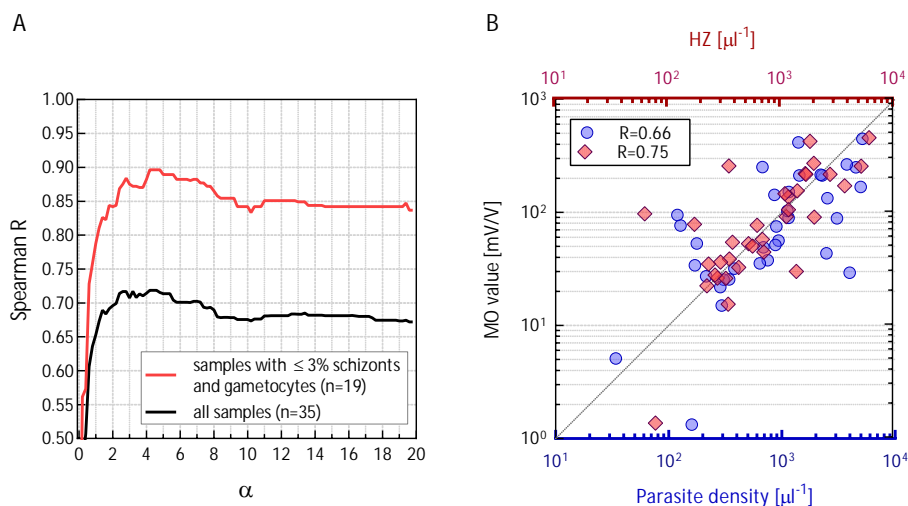

**Figure 3. Panel A.** The Spearman rank correlation coefficient between the MO values and the estimated hemozoin content,  $HZ = 1 \cdot Ri + \alpha \cdot T$ , as the function of  $\alpha$ . The red curve shows the correlation coefficient calculated for the subset of samples in which the proportion of schizonts and gametocytes was below 3% ( $n=19$ ). The black curve shows the correlation coefficient for the full sample set ( $n=35$ ). **Panel B.** The MO values as the function of parasite density (bottom x-axis, blue circles) and as the function of HZ (top x-axis, red diamonds). The latter was calculated using the value  $\alpha = 4.5$  (determined from the red curve in panel A), and also including the hemozoin contributions from schizonts and gametocytes, as described in the main text. The Spearman rank correlation coefficients for the two cases are also indicated.

## Discussion

149

The RMOD was able to classify all *P. vivax*-infected samples as malaria-positive with MO values typically 1 – 3 orders of magnitude higher than the cut-off level determined using samples of malaria-naïve volunteers. Furthermore, by preparing serial dilutions from the original patient samples, we found that parasite densities as low as a few parasites per a microliter of blood are still detectable by RMOD.

In our previously conducted large-scale field trial in Papua New Guinea, where expert light microscopy was used as the main reference method, the median MO value of the samples obtained from suspected patients whose light microscopy results were negative, was found to be 1.68 mV/V (IQR: 1.06 – 2.89 mV/V) [15]. This value is significantly higher than the mean MO value of the control samples in the current Thai study: 0.55 mV/V (IQR: 0.36 – 0.89 mV/V). The most plausible hypothesis to explain this observation is that a considerable portion of the patients at PNG, a high-transmission location, has residual hemozoin in the peripheral blood either due to low-density asymptomatic infections, or due to hemozoin crystals remaining in the circulation after recently treated or cleared infections. This factor increased the MO cut-off level in the PNG study and,

thus, seemingly compromised the diagnostic performance. 166

To further elaborate on this, we make a direct comparison between the field 167  
samples from Thailand and PNG in Fig.2C. where we present the MO values for 168  
all light microscopy-positive *P. vivax* samples collected in PNG (data reproduced 169  
from [15]). This comparison reveals that the Thai and PNG data sets follow the 170  
same trend and the magnitude of the MO values in the two studies spans the 171  
same range. Most importantly, for 98% of the samples found *P. vivax*-positive 172  
in the PNG study the MO values are located above 0.94 mV/V, the cut-off 173  
level determined in the current study. This supports the assumption that a 174  
considerable fraction of false-positive MO detections in the PNG study are due to 175  
the high residual hemozoin level present in the population at high transmission 176  
settings. However, to firmly confirm this hypothesis further large-scale studies 177  
are crucial in low-transmission and/or elimination settings. 178

RMOD quantifies the concentration of hemozoin in the peripheral blood which 179  
can be present within the parasites, erythrocytes or leukocytes at the time of 180  
sampling. Since a coarse categorisation of the erythrocytic stages was carried out 181  
and the densities of the different stages were determined by expert microscopy, 182  
the hemozoin production rates of the different stages could be estimated based 183  
on the MO values of the samples. We found that trophozoites in these *in vivo* *P.* 184  
*vivax* samples contain approx. 4.5 times more hemozoin than rings, while older 185  
stages (schizonts and gametocytes) contain 12 – 20 times larger amounts than 186  
rings. These values are comparable to the relative hemozoin production rates 187  
of rings, trophozoites and schizonts reported previously for *P. falciparum* cell 188  
cultures [14, 22, 23]. From this we conclude that the actual hemozoin content 189  
in peripheral blood primarily reflects the momentary hemozoin production rate, 190  
i.e., a dynamic equilibrium is maintained between hemozoin production and 191  
clearance, as also observed in rodent infections [12, 13]. However, since RMOD 192  
could also confirm the infection in samples containing exclusively ring stages, 193  
whose hemozoin content is much lower than the hemozoin content of trophozoites 194  
and schizonts, a non-negligible hemozoin accumulation also has to occur in the 195  
peripheral blood during acute infections. 196

The most important requirements towards a novel method for in-field malaria 197  
diagnostics are the ease of use and high sensitivity — ideally even the detection 198  
of asymptomatic infections. However, besides the highly reliable differentiation 199  
between positive and negative cases, the quantitative assessment of disease 200  
severity might provide crucial information in certain clinical situations. In 201  
clinical practice today the parasite density is used as the primary characteristics 202  
of acute malaria infections, however, the proportion of hemozoin-containing 203  
white blood cells has also been investigated as a potential indicator of prognosis 204  
[17, 24–26]. The relation between the intraleukocytic hemozoin content and 205  
disease severity reported in former studies implies that the overall hemozoin 206  
concentration in the peripheral circulation may also serve as a useful clinical 207



indicator [17, 24]. The quantitative nature of RMOD, realising a hemozoin-based 208  
diagnosis, can also be highly advantageous in this respect. 209

## Materials and Methods 210

### Sample collection and characterisation in Thailand 211

Sample collection was carried out in two field-clinics in the Kanchanaburi and 212  
Ratchaburi provinces of western Thailand from May 2014 to June 2015 (n=33), 213  
while two additional infected samples were obtained in July, 2016. Patients attend- 214  
ing to the clinics exhibiting symptoms consistent with malaria were tested for the 215  
infection using an SD Bioline Malaria Ag P.f/Pan rapid diagnosis test kit (Stan- 216  
dard Diagnostics Inc.) and/or via light microscopic (LM) examination of thick 217  
blood smears. Once a positive diagnosis was established, a blood sample of ap- 218  
proximately 250  $\mu$ l was collected into an EDTA-containing Microtainer<sup>®</sup> (Becton 219  
Dickinson and Company) via venipuncture from consented volunteers. The blood 220  
aliquots were subsequently frozen and transported over dry ice to the Mahidol 221  
Vivax Research Unit (MVRU) of Mahidol University, Bangkok, where they were 222  
stored at  $-70^{\circ}\text{C}$  until the completion of the RMOD measurements. 223

Approximately 40 uninfected blood samples were collected from two consented, 224  
malaria-naïve colleagues on-site at various time points over the study period for 225  
protocol optimisation and for the establishment of an uninfected baseline signal 226  
for the RMOD. These control samples were collected, frozen and stored the same 227  
way as the infected samples. Seven samples from both individuals were utilised 228  
to determine the uninfected baseline signal and the cut-off level of the study (see 229  
Fig.2A.) while the rest of the samples were used to prepare dilution series from 230  
ten infected samples (see Fig.2B.). 231

As a reference method for the RMOD study, a good-quality, Giemsa-stained 232  
thick blood smear was prepared from all *P. vivax*-infected samples on site, and 233  
analysed later by an expert microscopist at the central laboratory of MVRU, 234  
Bangkok. The morphological analysis of the parasites confirmed that all samples 235  
were infected exclusively with *P. vivax*. The thick blood smears were prepared 236  
using exactly one microliter of blood, thus by counting all the parasites in the 237  
total area of the smears ( $\times 1000$  magnification) the parasite density was therefore 238  
determined directly. Furthermore, the parasites detected in the smears were 239  
assigned to stage groups (rings, trophozoites, schizonts, male gametocytes and 240  
female gametocytes) according to their morphology. 241

### Sample collection and characterisation in PNG 242

The sample collection was carried out at two health facilities in Madang, located 243  
on the north coast of Papua New Guinea where *P. falciparum* and *P. vivax* are 244  
highly endemic [27]. During the period of November, 2017–July, 2018  $n=945$  245

blood samples were collected from suspected malaria patients and analysed by RMOD and multiple control methods, out of which  $n=104$  were found to be *P. vivax* mono-infections using LM as reference. Two blood slides for LM were prepared at enrolment and the LM analysis was carried out by the PNG Institute of Medical Research microscopy unit consisting of experienced, WHO-certified microscopists.

Thick blood smears were examined independently by two microscopists, for 200 thick-film fields ( $\times 1000$  magnification) before being declared *Plasmodium*-negative. Parasite density was calculated from the number of parasites per 200–500 leukocytes (depending on parasite density) and an assumed leukocyte density of 8000  $\mu\text{l}$  [28]. Slides were scored as LM-positive for an individual *Plasmodium* species if the species was detected independently by at least two microscopists.

### Ethics statements

The study conducted in Thailand received ethical clearance from the Ethics Committee at the Faculty of Tropical Medicine, Mahidol University (MUTM 2013-027-01). The study was clearly explained to all volunteers and informed consent was obtained from all participants in the study.

The study conducted in Papua New Guinea received ethical clearance by the PNG Institute of Medical Research (PNGIMR) Institutional Review Board and the PNG Medical Research Advisory Committee (MRAC, #16.45). All methods were carried out in accordance with the relevant guidelines and regulations of the named institutes.

### Magneto-optical measurements

The concept of the rotating-crystal magneto-optical setup and the underlying physical principles of hemozoin detection are described in detail in our former studies [10, 15]. Briefly, the liquid sample containing the elongated paramagnetic hemozoin crystals is inserted into the centre of a ring-shaped assembly of permanent magnets, which creates a strong uniform magnetic field at the sample position. When the magnetic ring is rotated, the crystals follow this rotation which modulates the intensity of the light passing through the sample. The modulated intensity divided by the average intensity, which has been shown to be linearly proportional to the crystal concentration, corresponds to the measured ‘MO values’ displayed in the corresponding figures in mV/V units [10].

For the RMOD analysis in Thailand, the frozen blood samples were thawed on room temperature, mixed thoroughly and 35  $\mu\text{l}$  of the partially lysed blood was mixed with 315  $\mu\text{l}$  of lysis solution (13 mM of NaOH and 0.03% (v/v) of Triton X-100 in distilled water) and allowed to stand for approximately 5 minutes to ensure complete lysis and homogenisation. Thereafter, 280  $\mu\text{l}$  of the lysate,

hereinafter referred to as optical sample, was transferred into the optical sample holders and the RMOD measurements were performed without further delay. Optical samples for RMOD measurements were prepared in duplicate per blood sample.

For the estimation of the RMOD sensitivity threshold two- or four-fold dilution series were prepared from ten infected samples. The infected samples were thawed and diluted with thawed aliquots of malaria-naïve blood samples frozen and stored together with the infected specimens. After the thorough mixing of the two components the final optical samples for the RMOD measurements were prepared as described above.

The magneto-optical measurements in Thailand and PNG were carried out with two RMOD devices that were technical replicates using the same measurement protocols. The only differences between the two RMOD experiment series were that in PNG the samples were freshly hemolysed and measured in triplicates per blood sample, while in Thailand the whole blood samples were frozen and stored until the completion of the RMOD measurements and they were measured in duplicates per blood sample.

## Acknowledgments

The authors would like to sincerely thank all study participants. We thank all involved health facility staff for their collaboration in these research studies. R.J.L is the recipient of an Australian National Health and Medical Research Council (NHMRC) Emerging Leadership Fellowship (GNT1173210). S.K. is a recipients of an NHMRC Career Development Fellowship (GNT1141441). A.B. and A.O. were supported by the BME-Nanotechnology and Materials Science FIKP grant of EMMI (BME FIKP-NAT) and NRDI Fund (TKP2020 IES, Grant No. BME-IE-NAT), Hungary.

## Author contributions

A.B., I. K. and A.O. developed the RMOD setup. R.J.L. and P.S. collected the patient samples in Thailand. N.M. carried out the light microscopy analysis of the Thai samples. S.K., W.N., I.M. and J.S coordinated the field studies in Thailand and PNG. A.O. carried out the RMOD measurements in Thailand. I.K., S.K. and A.O. analysed the data and wrote the manuscript. I.K. designed and supervised the project. All authors contributed to the discussion of the results.

## Competing interests

The authors declare no competing interests.

## Dual publication statement

321

A portion of data originating from one of our former studies is included in the  
current manuscript for comparison with our new, previously unpublished results.  
Specifically, parasite density and magneto-optical values of *Plasmodium vivax*-  
infected samples collected in Papua New Guinea, which have been presented  
previously in Ref. [15]. The origin of the data is clearly indicated in the legend  
of Fig.3. and throughout the manuscript.

322  
323  
324  
325  
326  
327

## References

1. World Health Organization. *Global Technical Strategy for Malaria 2016–2030* (World Health Organization, 2015).
2. Feachem, R. G., Phillips, A. A., Targett, G. A. & Snow, R. W. Call to action: priorities for malaria elimination. *Lancet* **376**, 1517–1521 (2010).
3. Nalbandian, R. M., Sammons, D. W., Manley, M., Xie, L., *et al.* A molecular-based magnet test for malaria. *Am J Clin Pathol* **103**, 57–64 (1995).
4. Zimmerman, P. A., Thomson, J. M., Fujioka, H., Collins, W. E. & Zborowski, M. Diagnosis of malaria by magnetic deposition microscopy. *Am J Trop Med Hyg* **74**, 568–572 (2006).
5. Newman, D. M., Heptinstall, J., Matelon, R. J., Savage, L., *et al.* A magneto-optic route toward the in vivo diagnosis of malaria: preliminary results and preclinical trial data. *Biophys J* **95**, 994–1000 (2008).
6. Newman, D. M., Matelon, R. J., Wears, M. L. & Savage, L. B. The In Vivo Diagnosis of Malaria: Feasibility Study Into a Magneto-Optic Fingertip Probe. *IEEE Journal of Selected Topics in Quantum Electronics* **16**, 573–580 (2010).
7. Yuen, C. & Liu, Q. Magnetic field enriched surface enhanced resonance Raman spectroscopy for early malaria diagnosis. *J Biomed Opt* **17**, 017005 (2012).
8. Egan, T. J. Physico-chemical aspects of hemozoin (malaria pigment) structure and formation. *Journal of Inorganic Biochemistry* **91**, 19–26 (2002).
9. Bohle, D. S., Dinnebier, R. E., Madsen, S. K. & Stephens, P. W. Characterization of the products of the heme detoxification pathway in malarial late trophozoites by X-ray diffraction. *J Biol Chem* **272**, 713–6 (1997).
10. Butykai, A., Orban, A., Kocsis, V., Szaller, D., *et al.* Malaria pigment crystals as magnetic micro-rotors: key for high-sensitivity diagnosis. *Sci Rep* **3**, 1431 (2013).

11. Orban, A., Butykai, A., Molnar, A., Prohle, Z., *et al.* Evaluation of a novel magneto-optical method for the detection of malaria parasites. *PLoS ONE* **9**, e96981 (2014).
12. Orban, A., Rebelo, M., Molnar, P., Albuquerque, I. S., *et al.* Efficient monitoring of the blood-stage infection in a malaria rodent model by the rotating-crystal magneto-optical method. *Sci Rep* **6**, 23218 (2016).
13. Pukancsik, M., Molnar, P., Orban, A., Butykai, A., *et al.* Highly Sensitive and Rapid Characterization of the Development of Synchronized Blood Stage Malaria Parasites Via Magneto-Optical Hemozoin Quantification. *Biomolecules* **9** (2019).
14. Molnár, P., Orbán, Á., Izrael, R., Babai, R., *et al.* Rapid and quantitative antimalarial drug efficacy testing via the magneto-optical detection of hemozoin. *Sci Rep* **10**, 14025 (2020).
15. Arndt, L., Koleala, T., Orbán, Á., Ibam, C., *et al.* Magneto-optical diagnosis of symptomatic malaria in Papua New Guinea. *Nature Communications* **12**, 969. ISSN: 2041-1723. <https://doi.org/10.1038/s41467-021-21110-w> (2021).
16. Day, N. P., Pham, T. D., Phan, T. L., Dinh, X. S., *et al.* Clearance kinetics of parasites and pigment-containing leukocytes in severe malaria. *Blood* **88**, 4694–4700 (1996).
17. Phu, N. H., Day, N., Diep, P. T., Ferguson, D. J. & White, N. J. Intraleucocytic malaria pigment and prognosis in severe malaria. *Transactions of The Royal Society of Tropical Medicine and Hygiene* **89**, 200–204 (1995).
18. Sriwichai, P., Karl, S., Samung, Y., Kiattibutr, K., *et al.* Imported Plasmodium falciparum and locally transmitted Plasmodium vivax: cross-border malaria transmission scenario in northwestern Thailand. *Malar J* **16**, 258 (2017).
19. Nguitraool, W., Karl, S., White, M., Koepfli, C., *et al.* Highly heterogeneous residual malaria risk in western Thailand. *Int J Parasitol* **49**, 455–462 (2019).
20. De Melo, G. C., Netto, R. L. A., Mwangi, V. I., Salazar, Y. E. A. R., *et al.* Performance of a sensitive haemozoin-based malaria diagnostic test validated for vivax malaria diagnosis in Brazilian Amazon. *Malaria Journal* **20**, 146. ISSN: 1475-2875. <https://doi.org/10.1186/s12936-021-03688-0> (2021).
21. Lopes, S. C. P., Albrecht, L., Carvalho, B. O., Siqueira, A. M., *et al.* Paucity of Plasmodium vivax Mature Schizonts in Peripheral Blood Is Associated With Their Increased Cytoadhesive Potential. <https://academic.oup.com/jid/article/209/9/1403/886874> (2014).

22. Moore, L. R., Fujioka, H., Williams, P. S., Chalmers, J. J., *et al.* Hemoglobin degradation in malaria-infected erythrocytes determined from live cell magnetophoresis. *FASEB J* **20**, 747–749 (2006).
23. Hanssen, E., Knoechel, C., Dearnley, M., Dixon, M. W., *et al.* Soft X-ray microscopy analysis of cell volume and hemoglobin content in erythrocytes infected with asexual and sexual stages of *Plasmodium falciparum*. *J Struct Biol* **177**, 224–232 (2012).
24. Lyke, K. E., Diallo, D. A., Dicko, A., Kone, A., *et al.* Association of intraleukocytic *Plasmodium falciparum* malaria pigment with disease severity, clinical manifestations, and prognosis in severe malaria. *Am J Trop Med Hyg* **69**, 253–259 (2003).
25. Hänscheid, T., Längin, M., Lell, B., Pötschke, M., *et al.* Full blood count and haemozoin-containing leukocytes in children with malaria: diagnostic value and association with disease severity. *Malar J* **7**, 109 (2008).
26. Kremsner, P. G., Valim, C., Missinou, M. A., Olola, C., *et al.* Prognostic value of circulating pigmented cells in African children with malaria. *J Infect Dis* **199**, 142–150 (2009).
27. Müller, I., Bockarie, M., Alpers, M. & Smith, T. The epidemiology of malaria in Papua New Guinea. *Trends in Parasitology* **19**, 253–259. ISSN: 1471-4922. [https://doi.org/10.1016/S1471-4922\(03\)00091-6](https://doi.org/10.1016/S1471-4922(03)00091-6) (2003).
28. Laman, M., Moore, B. R., Benjamin, J., Padapu, N., *et al.* Comparison of an assumed versus measured leucocyte count in parasite density calculations in Papua New Guinean children with uncomplicated malaria. *Malar J* **13**, 145 (2014).
